# Supplementary material for: Longitudinal study of DNA methylation and epigenetic clocks prior to and following test-confirmed COVID-19 and mRNA vaccination
Source: bioRxiv or medRxiv preprint supplement (doi:10.1101/2021.12.01.21266670), 2021-12-05

# **Longitudinal study of DNA methylation and epigenetic clocks prior to and following test-confirmed COVID-19 and mRNA vaccination**

## SUPPLEMENTARY MATERIALS

**Alina PS Pang<sup>1#</sup>, Albert T. Higgins-Chen<sup>2,3#</sup>, Florence Comite<sup>4,5</sup>, Ioana Raica<sup>4</sup>, Christopher Arboleda<sup>4</sup>, Hannah Went<sup>6</sup>, Tavis Mendez<sup>6</sup>, Michael Schotsaert<sup>7,8</sup>, Varun Dwaraka<sup>6</sup>, Ryan Smith<sup>6</sup>, Morgan E. Levine<sup>9</sup>, Lishomwa Ndhlovu<sup>1</sup>, Michael J. Corley<sup>1\*</sup>**

<sup>1</sup> Division of Infectious Diseases, Department of Medicine, Weill Cornell Medicine, New York, NY, USA

<sup>2</sup>Department of Psychiatry, Yale University School of Medicine, New Haven, CT, USA

<sup>3</sup>VA Connecticut Healthcare System, West Haven, CT, USA

<sup>4</sup>Comite Center for Precision Medicine & Health, New York, NY, USA

<sup>5</sup>Lenox Hill Hospital/Northwell, New York, NY, USA

<sup>6</sup>TruDiagnostic, Lexington, KY, USA

<sup>7</sup>Department of Microbiology, Icahn School of Medicine at Mount Sinai, New York, NY, USA

<sup>8</sup>Global Health and Emerging Pathogens Institute, Icahn School of Medicine at Mount Sinai, New York, NY, USA

<sup>9</sup>Department of Pathology, Yale University School of Medicine, New Haven, CT, USA

**#Authors Contributed Equally**



**Supplementary Figure S2.** Gene promoter transcription start site regulatory region of the apoptotic chromatin condensation inducer 1 (*ACIN1*)

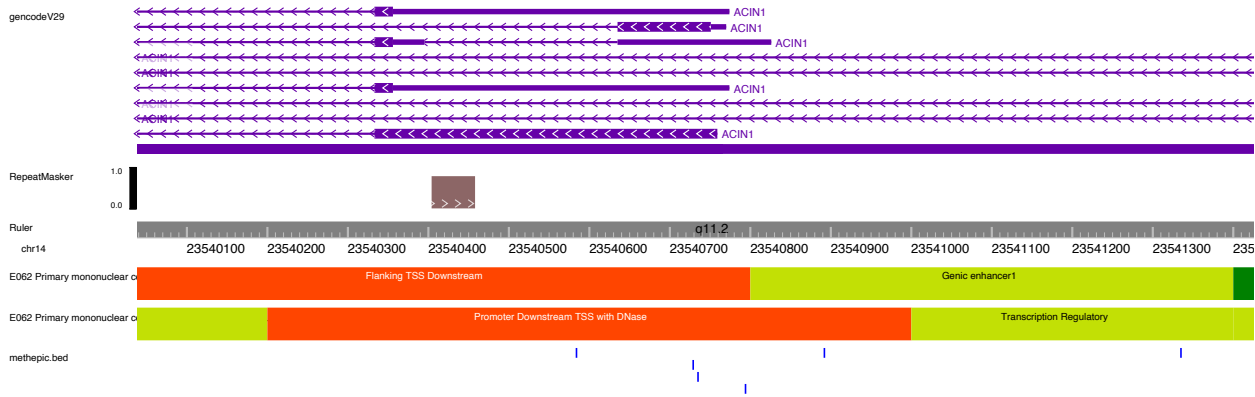

**Supplementary Figure S3.** Validation of cg10846936 in blood from 407 COVID-19 participants obtained from GEO GSE168739.

### ***CARD14* (cg10846936)**

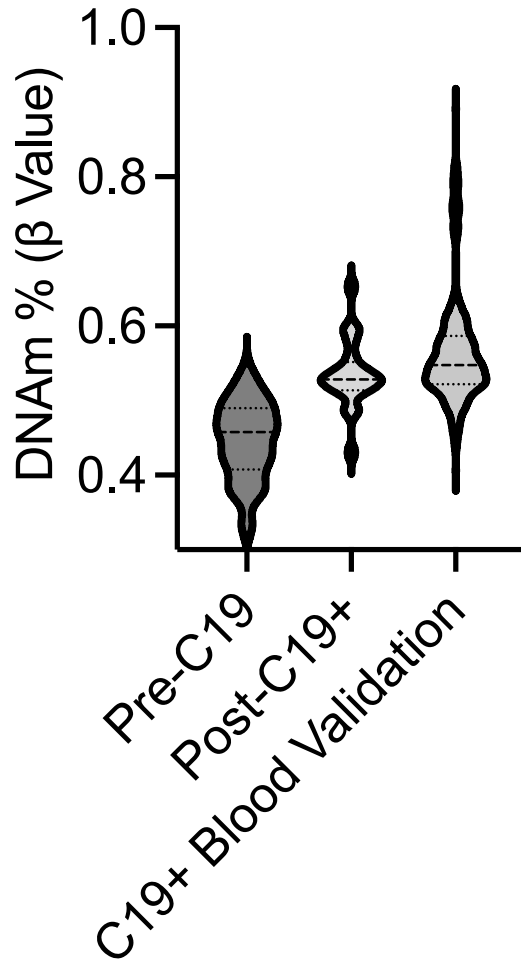

# Supplementary Figure S4

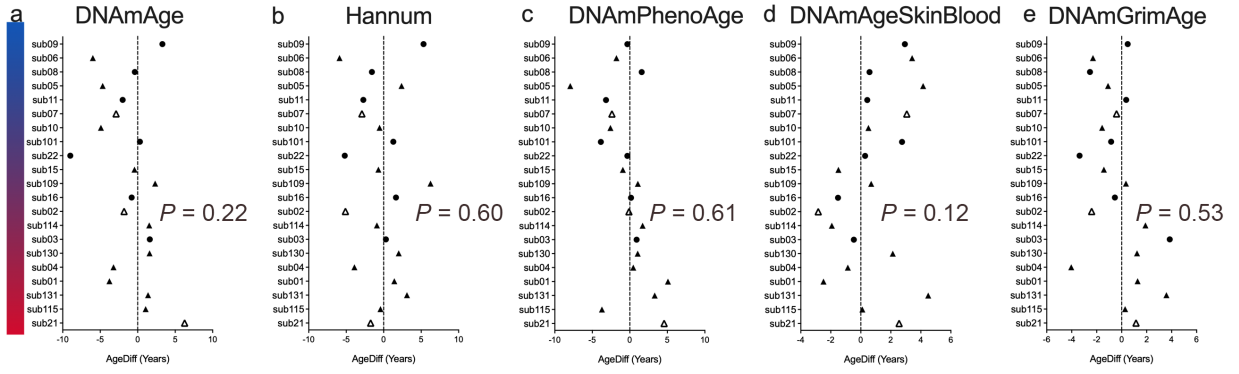

Supplementary Figure S5

DuneinPoAm45

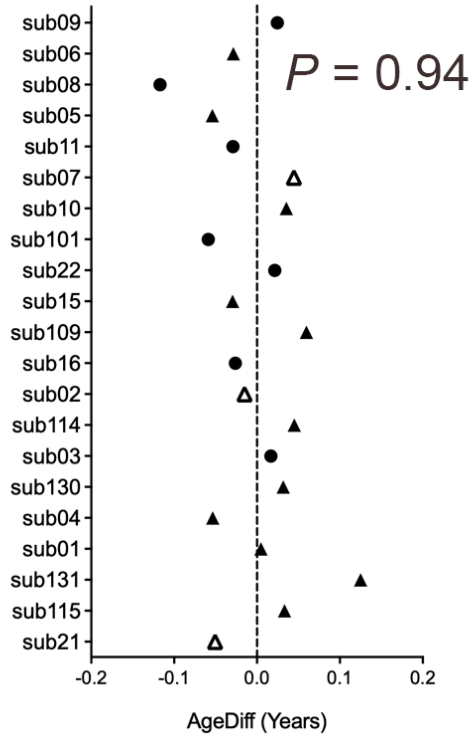

epiTOC

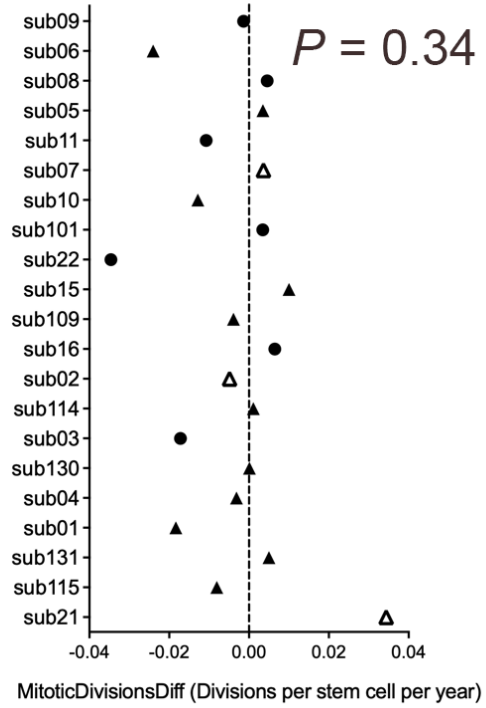

Supplementary Figure S6.

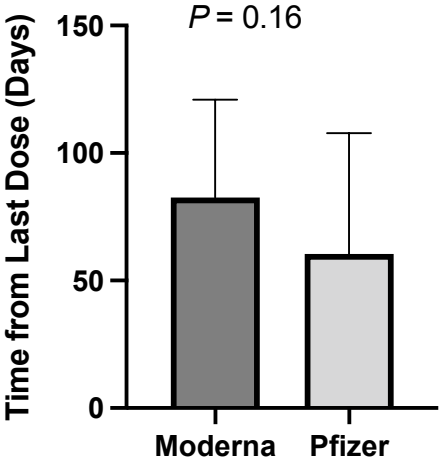

**Supplementary Figure S7.**

PC-based epigenetic age estimates in Calu-3 and Human Donor PBMC exposed to SARS-CoV-2 *in vitro*.

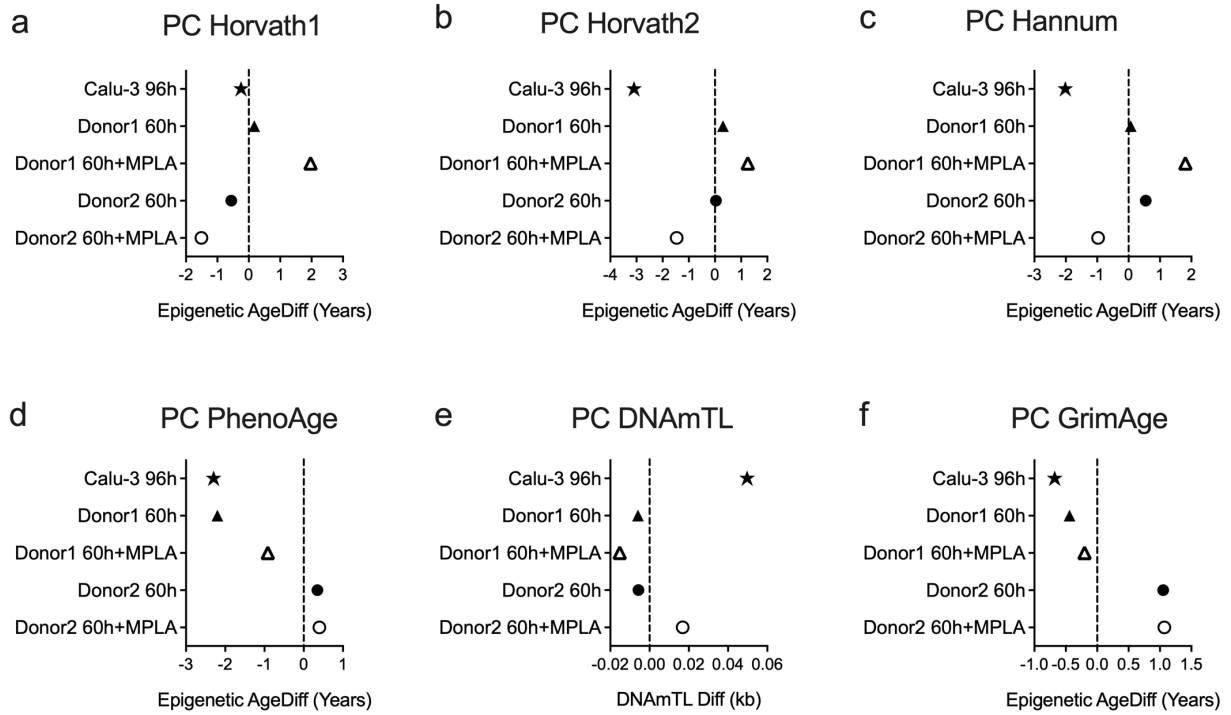



**Supplementary Figure S8.**

Validation of epigenetic age estimates in blood from participants at pre- and post-COVID-19 timepoints.

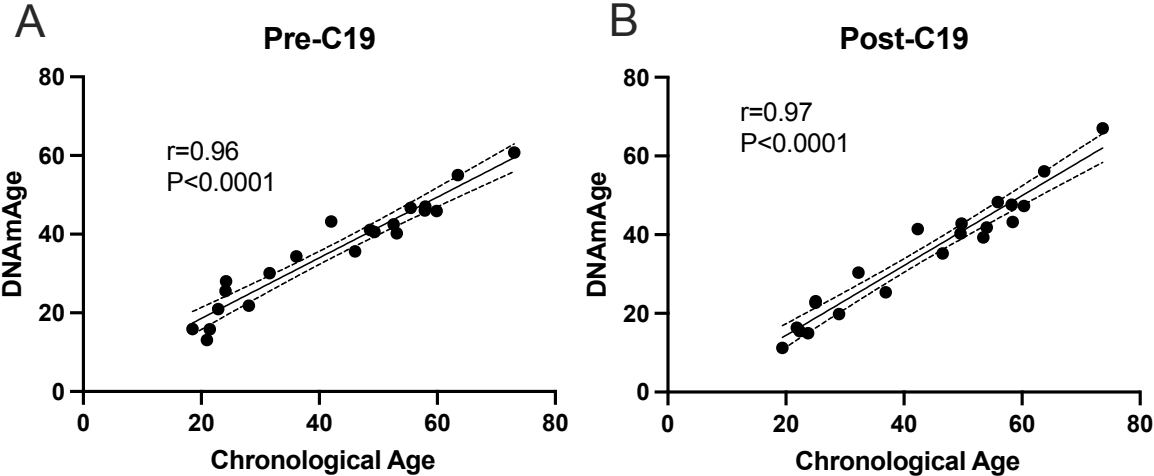

Supplement: Supplementary file [file media-1.pdf]
